# Supplementary material for: Stenomitos nagquensis sp. nov. (Leptolyngbyaceae, Cyanobacteria) from a Meadow Wetland in the Tibet Plateau: A Novel Species Studied Based on a Polyphasic Approach
Source: MDPI journal article supplement (doi:10.3390/d15040536), 2023-04-07
Supplement: s1 [file s1]

**Table S1.** List of gene regions, PCR amplification conditions, and their references as followed in this study.

| Region (Primers)                                  | PCR conditions                                                                                                                                                                                                        | Reference |
|---------------------------------------------------|-----------------------------------------------------------------------------------------------------------------------------------------------------------------------------------------------------------------------|-----------|
| 16S RNA gene with 16S–23S ITS region (8F/ BS23SR) | Initial denaturation at 95 °C for 5 minutes, followed by 35 cycles of denaturation at 94 °C for 1 min, annealing at 58 °C for 45 s, extension at 72 °C for 1 min 40 s, and a final extension at 72 °C for 10 min.     | [13]      |
| 16S rRNA gene (27F/1492R)                         | Initial denaturation at 94 °C for 5 min, 35 cycles at 94 °C for 30 s, 52 °C for 30 s, 72 °C for 30 s, and a final extension at 72 °C for 10 min.                                                                      | [35]      |
| 16S–23S ITS region (322F/340R)                    | Initial cycle consisting of 3 min at 95 °C, 2 min at 55 °C and 30 s at 72 °C, followed by 30 cycles of amplification (1.5 min at 95 °C, 2.5 min at 55 °C and 3 min at 72 °C, and a final extension at 72 °C for 7 min | [34,36]   |
| <i>rbcl</i> gene ( <i>rbclf/rbclr</i> )           | Initial denaturation at 94 °C for 5 min, followed by 30 cycles of denaturation at 92 °C for 1 min, annealing at 55 °C for 1 min, and extension at 72 °C for 2 min, and a final extension at 72 °C for 6 min.          | [37]      |

**Table S2.** A partial similarity matrix (%) generated using the 16S rRNA gene sequence of *Stenomitos nagquensis* sp. nov. and its closely related species.

| Strain                                        | 1    | 2    | 3    | 4    | 5    | 6    | 7    | 8    | 9    | 10   | 11   | 12   | 13   | 14   | 15   | 16   | 17   |
|-----------------------------------------------|------|------|------|------|------|------|------|------|------|------|------|------|------|------|------|------|------|
| 1 <i>Stenomitos nagquensis</i> CSML-F035      |      |      |      |      |      |      |      |      |      |      |      |      |      |      |      |      |      |
| 2 <i>Stenomitos rutilans</i> HA7619-LM2       | 98.2 |      |      |      |      |      |      |      |      |      |      |      |      |      |      |      |      |
| 3 <i>Stenomitos hiloensis</i> HA6792-KK3      | 98.9 | 89.7 |      |      |      |      |      |      |      |      |      |      |      |      |      |      |      |
| 4 <i>Stenomitos kolaensis</i> Pasv RS28       | 98.7 | 93.6 | 92.5 |      |      |      |      |      |      |      |      |      |      |      |      |      |      |
| 5 <i>Stenomitos pantisii</i> TAUMAC 4318      | 90.8 | 89.1 | 89.6 | 90.1 |      |      |      |      |      |      |      |      |      |      |      |      |      |
| 6 <i>Stenomitos tremulus</i> CPCC 471         | 99.2 | 98.3 | 99.2 | 98.9 | 91.1 |      |      |      |      |      |      |      |      |      |      |      |      |
| 7 <i>Stenomitos tenuis</i> PCM304.07          | 99.1 | 98.5 | 98.9 | 99.0 | 91.6 | 98.6 |      |      |      |      |      |      |      |      |      |      |      |
| 8 <i>Stenomitos frigidus</i> BEA 0966B        | 99.3 | 98.5 | 99.2 | 98.9 | 90.9 | 99.3 | 98.7 |      |      |      |      |      |      |      |      |      |      |
| 9 <i>Stenomitos frigidus</i> ANT. L52B.3      | 98.4 | 97.8 | 98.5 | 98.3 | 90.7 | 98.2 | 97.9 | 98.8 |      |      |      |      |      |      |      |      |      |
| 10 <i>Stenomitos frigidus</i> ANT.L8.1        | 98.7 | 98.0 | 98.3 | 98.0 | 88.8 | 98.3 | 98.3 | 98.8 | 98.2 |      |      |      |      |      |      |      |      |
| 11 <i>Stenomitos frigidus</i> ANT.L53B.1      | 98.6 | 97.9 | 98.2 | 97.9 | 88.7 | 98.2 | 98.2 | 98.7 | 98.1 | 99.7 |      |      |      |      |      |      |      |
| 12 <i>Stenomitos frigidus</i> ANT. L64B.1     | 98.7 | 98.2 | 98.8 | 98.5 | 90.2 | 98.6 | 98.6 | 98.6 | 98.3 | 98.7 | 98.7 |      |      |      |      |      |      |
| 13 <i>Stenomitos frigidus</i> ANT.L52.3       | 98.7 | 98.0 | 98.3 | 98.0 | 88.7 | 98.3 | 98.3 | 98.8 | 98.2 | 99.6 | 99.6 | 98.7 |      |      |      |      |      |
| 14 <i>Stenomitos frigidus</i> AR3-EA3         | 98.2 | 97.4 | 98.2 | 97.9 | 90.8 | 98.1 | 97.9 | 98.5 | 99.8 | 98.0 | 98.0 | 98.0 | 98.0 |      |      |      |      |
| 15 <i>Stenomitos</i> cf. <i>frigidus</i> 3CIP | 98.2 | 97.5 | 98.7 | 98.3 | 89.2 | 98.0 | 98.3 | 98.6 | 98.1 | 97.8 | 97.8 | 98.2 | 97.8 | 97.8 |      |      |      |
| 16 <i>Stenomitos frigidus</i> ACSSI_171       | 98.0 | 97.7 | 98.6 | 98.2 | 90.1 | 98.3 | 98.0 | 98.4 | 99.2 | 98.1 | 98.1 | 98   | 98.1 | 99.1 | 98.1 |      |      |
| 17 <i>Stenomitos frigidus</i> CANT10          | 97.7 | 97.7 | 98.3 | 98.3 | 90.2 | 97.9 | 97.7 | 98.1 | 98.9 | 97.9 | 97.9 | 97.7 | 97.9 | 98.8 | 97.8 | 99.3 |      |
| 18 <i>Stenomitos frigidus</i> CAU11           | 97.8 | 97.6 | 97.6 | 98.1 | 90.3 | 98.1 | 97.9 | 98.3 | 99.1 | 98.0 | 98.0 | 97.7 | 98.0 | 98.9 | 98.0 | 99.4 | 99.1 |
| 19 <i>Stenomitos frigidus</i> BEA 1253B       | 97.2 | 97.1 | 97.7 | 97.1 | 90   | 97.4 | 97.6 | 97.6 | 98.1 | 98.2 | 98.2 | 96.9 | 98.2 | 97.9 | 97.3 | 97.9 | 97.6 |
| 20 <i>Stenomitos</i> sp. BACA0708             | 98.1 | 90.3 | 97.2 | 92.6 | 91.2 | 99.1 | 99.1 | 98.5 | 98.4 | 98.7 | 98.7 | 97.9 | 98.7 | 98.1 | 98.6 | 97.6 | 97.5 |
| 21 <i>Stenomitos</i> sp. BACA0054             | 98.4 | 89.7 | 89.7 | 90.9 | 91.2 | 99.3 | 98.6 | 98.6 | 98.5 | 98.5 | 98.5 | 98.0 | 98.5 | 98.3 | 98.5 | 97.7 | 97.6 |
| 22 <i>Stenomitos</i> sp. BACA0618             | 97.9 | 89.6 | 89.6 | 91.0 | 91.2 | 98.9 | 99.1 | 98.1 | 98.2 | 98.4 | 98.4 | 97.8 | 98.4 | 97.9 | 98.5 | 97.3 | 97.3 |
| 23 <i>Stenomitos</i> sp. WJT24NPBG20          | 97.3 | 87.7 | 87.7 | 87.8 | 88.7 | 97.1 | 97.2 | 97.3 | 98.2 | 96.8 | 96.8 | 97.1 | 96.8 | 98   | 96.6 | 98.4 | 98.1 |
| 24 <i>Stenomitos</i> sp. SAG 37.90            | 98.9 | 98.4 | 98.4 | 99.1 | 91.2 | 99   | 99.1 | 98.6 | 98.6 | 98.7 | 98.7 | 98.2 | 98.7 | 98.3 | 98.6 | 97.6 | 97.3 |
| 25 <i>Stenomitos</i> sp. KPABG 610003         | 99.2 | 87.4 | 87.4 | 90.2 | 89.5 | 98.6 | 99.3 | 98.8 | 98.7 | 98.6 | 98.6 | 99.0 | 98.5 | 98.4 | 98.7 | 98.5 | 98.3 |
| 26 <i>Stenomitos</i> sp. KPABG 610004         | 99.3 | 86.9 | 91.6 | 89.6 | 88.9 | 99.9 | 98.5 | 99.2 | 98.4 | 98.4 | 98.4 | 98.6 | 98.4 | 98.1 | 98.1 | 98.4 | 98.1 |
